# Supplementary material for: Acceptance and Commitment Therapy for Psychosocial Outcomes in Children and Young People with Long-Term Conditions: A Systematic Review of Intervention Studies
Source: Research Square preprint supplement (doi:10.21203/rs.3.rs-6699044/v1), 2025-09-01
Supplement: Supplementary file 3 [file 9bbd2956c7b0fb57d0b193a0.docx]

**Supplementary File 2**

**Search Strategy**

**CINAHL (EBSCO)**

| 1 | TI (Child* OR Adolescen* OR Teen* OR youth* OR young* OR juvenile* OR paediatric* OR pediatric* OR Boy* OR Girl* OR Schoolchild* OR Minor* OR "Under 18") |
| --- | --- |
| 2 | AB (Child* OR Adolescen* OR Teen* OR youth* OR young* OR juvenile* OR paediatric* OR pediatric* OR Boy* OR Girl* OR Schoolchild* OR Minor* OR "Under 18") |
| 3 | 1 or 2 |
| 4 | TI ("acceptance and commitment therapy" OR "DNA-V" OR "Discoverer Noticer Advisor?Values" OR "psychological flexibility") |
| 5 | AB ("acceptance and commitment therapy" OR "DNA-V" OR "Discoverer Noticer Advisor?Values" OR "psychological flexibility") |
| 6 | 4 or 5 |
| 7 | 3 and 6 |

**Cochrane Library**

| 1 | Title Abstract Keyword (Child* or Adolescen* or Teen* or youth* or young* or juvenile* or paediatric* or pediatric* or Boy* or Girl* or Schoolchild* or Minor* or "Under 18") |
| --- | --- |
| 2 | Title Abstract Keyword ("acceptance and commitment therapy" or "DNA-V" or "Discoverer Noticer Advisor?Values" or "psychological flexibility") |
| 3 | 1 and 2 |

**Embase (Ovid)**

| 1 | (Child* or Adolescen* or Teen* or youth* or young* or juvenile* or paediatric* or pediatric* or Boy* or Girl* or Schoolchild* or Minor* or "Under 18").ti,ab,kf. |
| --- | --- |
| 2 | ("acceptance and commitment therapy" or "DNA-V" or "Discoverer Noticer Advisor?Values" or "psychological flexibility").ti,ab,kf. |
| 3 | 1 and 2 |

**MEDLINE (Ovid)**

| 1 | (Child* or Adolescen* or Teen* or youth* or young* or juvenile* or paediatric* or pediatric* or Boy* or Girl* or Schoolchild* or Minor* or "Under 18").ti,ab,kf. |
| --- | --- |
| 2 | ("acceptance and commitment therapy" or "DNA-V" or "Discoverer Noticer Advisor?Values" or "psychological flexibility").ti,ab,kf. |
| 3 | 1 and 2 |

**PsycInfo (Ovid)**

| 1 | (Child* or Adolescen* or Teen* or youth* or young* or juvenile* or paediatric* or pediatric* or Boy* or Girl* or Schoolchild* or Minor* or "Under 18").ti,ab,kf. |
| --- | --- |
| 2 | ("acceptance and commitment therapy" or "DNA-V" or "Discoverer Noticer Advisor?Values" or "psychological flexibility").ti,ab,kf. |
| 3 | 1 and 2 |
