# Supplementary material for: Acceptance and Commitment Therapy for Psychosocial Outcomes in Children and Young People with Long-Term Conditions: A Systematic Review of Intervention Studies
Source: Research Square preprint supplement (doi:10.21203/rs.3.rs-6699044/v1), 2025-09-01
Supplement: Supplementary file 4 [file d91c748c720abb2c243ab43b.docx]

**BMC Pediatrics Supplementary File 1**

**Appendix B: SRL Preferred Reporting Items for Systematic review and Meta-Analysis (PRISMA) 2020 Checklist with Synthesis Without Meta-Analysis (SwiM) 2019 Reporting Items**

| **Section and Topic** | **Item #** | **Checklist item** | **Location where item is reported** |
| --- | --- | --- | --- |
| **TITLE** | | |  |
| Title | 1 | Identify the report as a systematic review. | Page 1. |
| **ABSTRACT** | | |  |
| Abstract | 2 | See the PRISMA 2020 for Abstracts checklist. | Pages 2-3. |
| **INTRODUCTION** | | |  |
| Rationale | 3 | Describe the rationale for the review in the context of existing knowledge. | Pages 4-6. |
| Objectives | 4 | Provide an explicit statement of the objective(s) or question(s) the review addresses. | Pages 6-7. |
| **METHODS** | | |  |
| Eligibility criteria | 5 | Specify the inclusion and exclusion criteria for the review and how studies were grouped for the syntheses. | Pages 8-9 (and Table 1). |
| Information sources | 6 | Specify all databases, registers, websites, organisations, reference lists and other sources searched or consulted to identify studies. Specify the date when each source was last searched or consulted. | Pages 7-8. |
| Search strategy | 7 | Present the full search strategies for all databases, registers and websites, including any filters and limits used. | Pages 7-8 and Supplementary File 1. |
| Selection process | 8 | Specify the methods used to decide whether a study met the inclusion criteria of the review, including how many reviewers screened each record and each report retrieved, whether they worked independently, and if applicable, details of automation tools used in the process. | Page 9. |
| Data collection process | 9 | Specify the methods used to collect data from reports, including how many reviewers collected data from each report, whether they worked independently, any processes for obtaining or confirming data from study investigators, and if applicable, details of automation tools used in the process. | Pages 9-10 and Supplementary File 2. |
| Data items | 10a | List and define all outcomes for which data were sought. Specify whether all results that were compatible with each outcome domain in each study were sought (e.g. for all measures, time points, analyses), and if not, the methods used to decide which results to collect. | Pages 9-10 and Supplementary File 2. |
| 10b | List and define all other variables for which data were sought (e.g. participant and intervention characteristics, funding sources). Describe any assumptions made about any missing or unclear information. | Pages 9-10 and Supplementary File 2. |
| Study risk of bias assessment | 11 | Specify the methods used to assess risk of bias in the included studies, including details of the tool(s) used, how many reviewers assessed each study and whether they worked independently, and if applicable, details of automation tools used in the process. | Page 11. |
| Effect measures | 12 | Specify for each outcome the effect measure(s) (e.g. risk ratio, mean difference) used in the synthesis or presentation of results. | Pages 10-11. |
| Synthesis methods | 13a | Describe the processes used to decide which studies were eligible for each synthesis (e.g. tabulating the study intervention characteristics and comparing against the planned groups for each synthesis (item #5)). | Pages 10-11. |
| 13b | Describe any methods required to prepare the data for presentation or synthesis, such as handling of missing summary statistics, or data conversions. | Pages 10-11. |
| 13c | Describe any methods used to tabulate or visually display results of individual studies and syntheses. | Page 10. |
| 13d | Describe any methods used to synthesize results and provide a rationale for the choice(s). If meta-analysis was performed, describe the model(s), method(s) to identify the presence and extent of statistical heterogeneity, and software package(s) used. | Page 10. |
| 13e | Describe any methods used to explore possible causes of heterogeneity among study results (e.g. subgroup analysis, meta-regression). | Pages 10-11. |
| 13f | Describe any sensitivity analyses conducted to assess robustness of the synthesized results. | N/A – see item 15. |
| Reporting bias assessment | 14 | Describe any methods used to assess risk of bias due to missing results in a synthesis (arising from reporting biases). | Page 10. |
| Certainty assessment | 15 | Describe any methods used to assess certainty (or confidence) in the body of evidence for an outcome. | N/A - not formally conducted, due to substantial clinical and methodological heterogeneity and large number of outcomes across different long-term physical health conditions. Thus, certainty of evidence grading was unlikely to be meaningful, in line with SWiM guidance which recognises this assessment may not always be suitable/applicable. |
| **RESULTS** | | |  |
| Study selection | 16a | Describe the results of the search and selection process, from the number of records identified in the search to the number of studies included in the review, ideally using a flow diagram. | Pages 11-12 and Figure 1. |
| 16b | Cite studies that might appear to meet the inclusion criteria, but which were excluded, and explain why they were excluded. | Figure 1. |
| Study characteristics | 17 | Cite each included study and present its characteristics. | Pages 12-14 and Tables 2 and 3. |
| Risk of bias in studies | 18 | Present assessments of risk of bias for each included study. | Pages 14-17 and Figure 2. |
| Results of individual studies | 19 | For all outcomes, present, for each study: (a) summary statistics for each group (where appropriate) and (b) an effect estimate and its precision (e.g. confidence/credible interval), ideally using structured tables or plots. | Pages 17-27 and Tables 4, 5, 6, 7 and 8. |
| Results of syntheses | 20a | For each synthesis, briefly summarise the characteristics and risk of bias among contributing studies. | Pages 17-27 and Tables 4, 5, 6, 7 and 8. |
| 20b | Present results of all statistical syntheses conducted. If meta-analysis was done, present for each the summary estimate and its precision (e.g. confidence/credible interval) and measures of statistical heterogeneity. If comparing groups, describe the direction of the effect. | Pages 17-27 and Tables 4, 5, 6, 7 and 8. |
| 20c | Present results of all investigations of possible causes of heterogeneity among study results. | Pages 17-27 and Tables 4, 5, 6, 7 and 8. |
| 20d | Present results of all sensitivity analyses conducted to assess the robustness of the synthesized results. | N/A – see item 15. |
| Reporting biases | 21 | Present assessments of risk of bias due to missing results (arising from reporting biases) for each synthesis assessed. | Page 18. |
| Certainty of evidence | 22 | Present assessments of certainty (or confidence) in the body of evidence for each outcome assessed. | N/A – see item 15. |
| **DISCUSSION** | | |  |
| Discussion | 23a | Provide a general interpretation of the results in the context of other evidence. | Pages 28-31. |
| 23b | Discuss any limitations of the evidence included in the review. | Pages 31-32. |
| 23c | Discuss any limitations of the review processes used. | Pages 31-32. |
| 23d | Discuss implications of the results for practice, policy, and future research. | Pages 32-33. |
| **OTHER INFORMATION** | | |  |
| Registration and protocol | 24a | Provide registration information for the review, including register name and registration number, or state that the review was not registered. | Pages 2 and 7. |
| 24b | Indicate where the review protocol can be accessed, or state that a protocol was not prepared. | Pages 2 and 7. |
| 24c | Describe and explain any amendments to information provided at registration or in the protocol. | Page 10. |
| Support | 25 | Describe sources of financial or non-financial support for the review, and the role of the funders or sponsors in the review. | Page 44. |
| Competing interests | 26 | Declare any competing interests of review authors. | Page 44. |
| Availability of data, code and other materials | 27 | Report which of the following are publicly available and where they can be found: template data collection forms; data extracted from included studies; data used for all analyses; analytic code; any other materials used in the review. | Template data collection form(s). Data exrracted from included studies presented in systematic review. |

| **SWiM is intended to complement and be used as an extension to PRISMA** | | |
| --- | --- | --- |
| **SWiM reporting item** | **Item description** | **Page in manuscript where item is reported** |
| **1** Grouping studies for synthesis | 1a) Provide a description of, and rationale for, the groups used in the synthesis (e.g., groupings of populations, interventions, outcomes, study design) | Page 10. |
| 1b) Detail and provide rationale for any changes made subsequent to the protocol in the groups used in the synthesis | N/A – no changes made to grouping(s). |
| **2** Describe the standardised metric and transformation methods used | Describe the standardised metric for each outcome. Explain why the metric(s) was chosen, and describe any methods used to transform the intervention effects, as reported in the study, to the standardised metric, citing any methodological guidance consulted | Pages 10-11. |
| **3** Describe the synthesis methods | Describe and justify the methods used to synthesise the effects for each outcome when it was not possible to undertake a meta-analysis of effect estimates | Pages 10-11. |
| **4** Criteria used to prioritise results for summary and synthesis | Where applicable, provide the criteria used, with supporting justification, to select the particular studies, or a particular study, for the main synthesis or to draw conclusions from the synthesis (e.g., based on study design, risk of bias assessments, directness in relation to the review question) | Page 10. |
| **5** Investigation of heterogeneity in reported effects | State the method(s) used to examine heterogeneity in reported effects when it was not possible to undertake a meta-analysis of effect estimates and its extensions to investigate heterogeneity | Pages 10-11. |
| **6** Certainty of evidence | Describe the methods used to assess certainty of the synthesis findings | N/A - not formally conducted, due to substantial clinical and methodological heterogeneity and large number of outcomes across different long-term physical health conditions. Thus, certainty of evidence grading was unlikely to be meaningful, in line with SWiM guidance which recognises this assessment may not always be suitable/applicable. |
| **7** Data presentation methods | Describe the graphical and tabular methods used to present the effects (e.g., tables, forest plots, harvest plots).  Specify key study characteristics (e.g., study design, risk of bias) used to order the studies, in the text and any tables or graphs, clearly referencing the studies included | Page 10. |
| **8** Reporting results | For each comparison and outcome, provide a description of the synthesised findings, and the certainty of the findings. Describe the result in language that is consistent with the question the synthesis addresses, and indicate which studies contribute to the synthesis | Pages 17-27 and Tables 4, 5, 6, 7 and 8. |
| *Discussion* |  |  |
| **9** Limitations of the synthesis | Report the limitations of the synthesis methods used and/or the groupings used in the synthesis, and how these affect the conclusions that can be drawn in relation to the original review question | Pages 31-32. |
